# Supplementary material for: Practitioners’ perceptions of acceptability of a question prompt list about palliative care for advance care planning with people living with dementia and their family caregivers: a mixed-methods evaluation study
Source: PubMed Central journal article supplement — BMJ Open. 2021 Apr 12;11(4):e044591. doi: 10.1136/bmjopen-2020-044591 (PMC8048016; doi:10.1136/bmjopen-2020-044591), 2021-04-12
Supplement: bmjopen-2020-044591supp002.pdf [file bmjopen-2020-044591supp002.pdf]

## Supplement 2. Acceptability and all scale item scores: Tables with individual items and item scores

### S1. Acceptability scale **adaptations (track changes)** compared to acceptability scale for evaluation of a family booklet<sup>12-14</sup>

Use of the question prompt list in practice

This section is about your expectations when using the question prompt list in your practice. Could you please indicate the extent to which you agree or disagree with each statement? (*circle the number that applies*)

|                                                                                                                                                                                                           | strongly<br>DISagree |   | → |   | strongly<br>agree |
|-----------------------------------------------------------------------------------------------------------------------------------------------------------------------------------------------------------|----------------------|---|---|---|-------------------|
| a. This <del>question prompt list</del> <del>booklet</del> will help families <del>and a (capable) person with dementia</del> better understand the natural course and possible complications of dementia | 1                    | 2 | 3 | 4 | 5                 |
| b. This <del>question prompt list</del> <del>booklet</del> will result in <del>them</del> <del>my patients' families</del> making more informed decisions                                                 | 1                    | 2 | 3 | 4 | 5                 |
| c. This <del>question prompt list</del> <del>booklet</del> is suitable for helping <del>patients' families</del> <del>etos</del> make value laden choices                                                 | 1                    | 2 | 3 | 4 | 5                 |
| d. <del>The</del> <del>is</del> <del>question prompt list</del> <del>booklet</del> will positively affect my relationships with <del>the person with dementia and the</del> families                      | 1                    | 2 | 3 | 4 | 5                 |
| e. <del>This</del> <del>question prompt list</del> <del>booklet</del> will improve the quality of discussions with <del>families</del> <del>them</del>                                                    | 1                    | 2 | 3 | 4 | 5                 |
| f. <del>This</del> <del>question prompt list</del> <del>e</del> <del>booklet</del> will increase <del>family</del> satisfaction <del>of the person with dementia and the family</del> with my care        | 1                    | 2 | 3 | 4 | 5                 |
| g. This <del>question prompt list</del> <del>booklet</del> will increase shared understanding of <del>patient's</del> preferences <del>of the person with dementia</del>                                  | 1                    | 2 | 3 | 4 | 5                 |
| h. This <del>question prompt list</del> <del>booklet</del> will increase <del>family</del> consensus on decision making <del>between the person with dementia and family, and within families</del>       | 1                    | 2 | 3 | 4 | 5                 |
| i. This <del>question prompt list</del> <del>booklet</del> complements my usual approach                                                                                                                  | 1                    | 2 | 3 | 4 | 5                 |
| j. This <del>question prompt list</del> <del>booklet</del> will be easy for me to use                                                                                                                     | 1                    | 2 | 3 | 4 | 5                 |
| k. I would decide to adopt <del>this question prompt list</del> <del>it</del> even before experimenting with it                                                                                           | 1                    | 2 | 3 | 4 | 5                 |
| l. Using this <del>question prompt list</del> <del>booklet</del> will save me time.                                                                                                                       | 1                    | 2 | 3 | 4 | 5                 |

|                                                                                                                                                          |   |   |   |   |   |
|----------------------------------------------------------------------------------------------------------------------------------------------------------|---|---|---|---|---|
| m. This <a href="#">question prompt list</a> is likely to be used by most of my colleagues                                                               | 1 | 2 | 3 | 4 | 5 |
| n. This <a href="#">question prompt list</a> should be used as a teaching aid <a href="#">in training or continued medical education</a> for physicians* | 1 | 2 | 3 | 4 | 5 |
| o. This <a href="#">question prompt list</a> should be used as a teaching aid <a href="#">in training or continued medical education</a> for nurses*     | 1 | 2 | 3 | 4 | 5 |

\* Includes training before and after certification

## S2. Acceptability of the question prompt list item scores (n=66 respondents)\*

|                                                                                                                                                                  | mean       | SD         |
|------------------------------------------------------------------------------------------------------------------------------------------------------------------|------------|------------|
| a. This question prompt list will help families and a (capable) person with dementia better understand the natural course and possible complications of dementia | 3.7        | 0.93       |
| b. This question prompt list will result in them making more informed decisions                                                                                  | <b>4.0</b> | 0.72       |
| c. This question prompt list is suitable for helping to make value laden choices                                                                                 | 3.6        | 0.89       |
| d. This question prompt list will positively affect my relationships with the person with dementia and the families                                              | 3.4        | 0.92       |
| e. This question prompt list will improve the quality of discussions with them                                                                                   | 3.7        | 0.86       |
| f. This question prompt list will increase satisfaction of the person with dementia and the family with my care                                                  | 3.3        | 0.89       |
| g. This question prompt list will increase shared understanding of preferences of the person with dementia                                                       | 3.7        | 0.89       |
| h. This question prompt list will increase consensus on decision making between the person with dementia and family, and within families                         | 3.5        | 0.87       |
| i. This question prompt list complements my usual approach                                                                                                       | 3.5        | <b>1.2</b> |
| j. This question prompt list will be easy for me to use                                                                                                          | 3.0        | <b>1.0</b> |
| k. I would decide to adopt this question prompt list even before experimenting with it                                                                           | <b>2.5</b> | <b>1.1</b> |
| l. Using this question prompt list will save me time.                                                                                                            | <b>2.7</b> | 0.99       |
| m. This question prompt list is likely to be used by most of my colleagues                                                                                       | <b>2.9</b> | 0.94       |
| n. This question prompt list should be used as a teaching aid in training or continued medical education for physicians                                          | 3.8        | 0.96       |
| o. This question prompt list should be used as a teaching aid in training or continued medical education for nurses                                              | 3.8        | 0.89       |

Interpretation: summed scores range 15-75 with  $\geq 45$  meaning “acceptable.” This equates to item scores  $\geq 3$ .

Summed scores of  $\geq 60$  mean “highly acceptable” and this equates to item scores  $\geq 4$ . Cronbach’s alpha 0.94.

Bold indicates either **not** acceptable (red) or **highly** acceptable (green), and **large variation** (red,  $> 1$  SD).

No differences ( $p < 0.05$ , t-test) were observed between elderly care physicians and GPs, except for the items f (mean 3.2 SD 0.88 for elderly care physicians vs. 3.7 SD 0.84 for GPs) and j (mean 3.2 SD 0.93 for elderly care physicians vs. 2.6 SD 1.1 for GPs).

\*Number of missing values of 66, per item: 2 (because 2 respondents did not complete the scale), except for item c (a total of 3 missing values) and item m (a total of 4 missing values).

**S3. Quality of the content of the question prompt list**

|                                                                                         | mean                     | SD                 | N*       |
|-----------------------------------------------------------------------------------------|--------------------------|--------------------|----------|
| <i>Part 1: About illness and care</i>                                                   |                          |                    |          |
| Dementia and changes in health information questions                                    | 3.7<br>3.5               | 0.84<br><b>1.0</b> | 65<br>65 |
| Care goals, palliative care and end-of-life decisions information questions             | 3.8<br>3.7               | 0.99<br>0.80       | 65<br>63 |
| <i>Part 2: About treatment and choices with health problems</i>                         |                          |                    |          |
| Decisions about treatments and agreements (advance care planning) information questions | 4.0<br>4.0               | 0.85<br>0.84       | 64<br>65 |
| Treatment and care for common problems information questions                            | 4.0<br>3.9               | 0.82<br>0.81       | 64<br>64 |
| Resuscitation and euthanasia information questions                                      | <b>4.0</b><br><b>4.0</b> | 0.91<br>0.87       | 63<br>62 |
| Choice of location of care and change of living environment information questions       | <b>4.1</b><br><b>4.0</b> | 0.72<br>0.73       | 64<br>64 |
| <i>Part 3: Relatives</i>                                                                |                          |                    |          |
| Care for you as a relative information questions                                        | <b>4.3</b><br><b>4.2</b> | 0.67<br>0.61       | 64<br>64 |
| The dying phase and the period after death information questions                        | <b>4.2</b><br><b>4.1</b> | 0.77<br>0.74       | 63<br>62 |

Bold indicates either **close to poor** (red, mean rating 1 to 2; did not occur) or **close to excellent** (green, mean rating 4-5), and **large variation** (red, > 1 SD).

No differences ( $p < 0.05$ , t-test) were observed between elderly care physicians and GPs.

\*One missing value ( $n=65$ ) was due to a respondent who did not rate any quality item—but did complete the acceptability scale as the primary outcome.

**S4. Perceived barriers to implementation of the question prompt list** (agreement scaled as in Table S1, acceptability)

|                                                                                                                                                                    | mean | SD         | n  |
|--------------------------------------------------------------------------------------------------------------------------------------------------------------------|------|------------|----|
| The hectic pace of practice will prevent me from using the question prompt list                                                                                    | 2.8  | <b>1.1</b> | 64 |
| This question prompt list will cause the person living dementia or the family to be anxious                                                                        | 2.9  | <b>1.1</b> | 64 |
| I don't expect people living with dementia and family will want to use the question prompt list                                                                    | 2.5  | 0.93       | 64 |
| Going through the question prompt list gives me enough inspiration for conversations: it is not necessary to hand it out to people living with dementia and family | 2.4  | <b>1.1</b> | 64 |
| The advantages of working with the conversation aid will not outweigh the time and effort invested                                                                 | 2.6  | 0.89       | 64 |

Bold indicates either **close to strongly disagree** (red, mean 1 to 2; did not occur) or **close to strongly agree** (green, mean rating 4-5; did not occur), and **large variation** (red, > 1 SD).

No differences ( $p < 0.05$ , t-test) were observed between elderly care physicians and GPs, except for the item "The hectic pace of practice will prevent me from using the question prompt list" (mean 2.5 SD 1.0 for elderly care physicians vs. 3.6 SD 0.98 for GPs).

**S5. Goals achieved and anticipated benefits of the question prompt list** (agreement scaled as in Table S1, acceptability)

|                                                                                                                                                                                       | mean | SD   | n  |
|---------------------------------------------------------------------------------------------------------------------------------------------------------------------------------------|------|------|----|
| <b>Question prompt list goals achieved</b>                                                                                                                                            |      |      |    |
| This question prompt list will help the (capable) person living with dementia and the family organise their thoughts about the later stage of life                                    | 3.8  | 0.84 | 64 |
| This question prompt list will help them formulate important questions about dementia and end-of-life care, making it easier to ask the health care professional questions            | 3.9  | 0.81 | 64 |
| This question prompt list will help them to have conversations with healthcare professionals and also conversations with each other                                                   | 3.8  | 0.79 | 64 |
| This question prompt list will make choices about care and treatment easier for them                                                                                                  | 3.2  | 0.91 | 64 |
| <b>Other possible benefits of the question prompt list</b>                                                                                                                            |      |      |    |
| This question prompt list will help them to get information that is important to them in a timely manner                                                                              | 3.7  | 0.82 | 63 |
| This question prompt list will make a person living with dementia or family feel supported and understood as to what they go through, and they will be better prepared for the future | 3.6  | 0.94 | 63 |
| Thanks to this question prompt list they can get the best possible personalized care.                                                                                                 | 3.1  | 0.88 | 62 |

Bold indicates either **close to strongly disagree** (red, mean 1 to 2; did not occur) or **close to strongly agree** (green, mean rating 4-5; did not occur), and **large variation** (red, > 1 SD; did not occur).

No differences ( $p < 0.05$ , t-test) were observed between elderly care physicians and GPs.
